# Supplementary material
Source: Springer Nature journal article supplement (https://www.springermedizin.de/resource/supplementary/12984_2005_63_MOESM8_ESM.pdf/9605226)

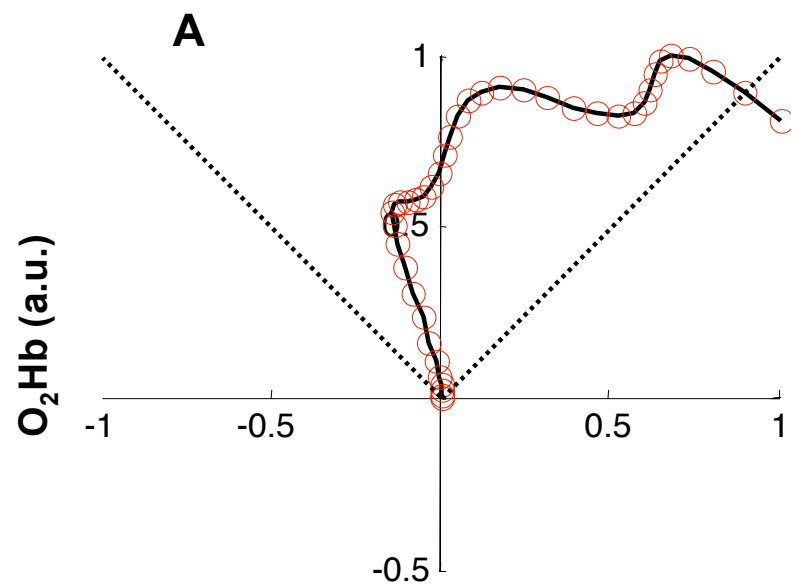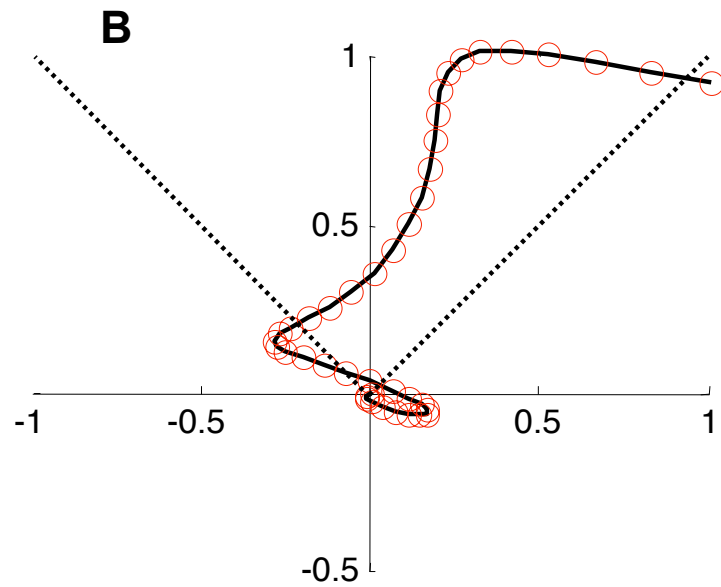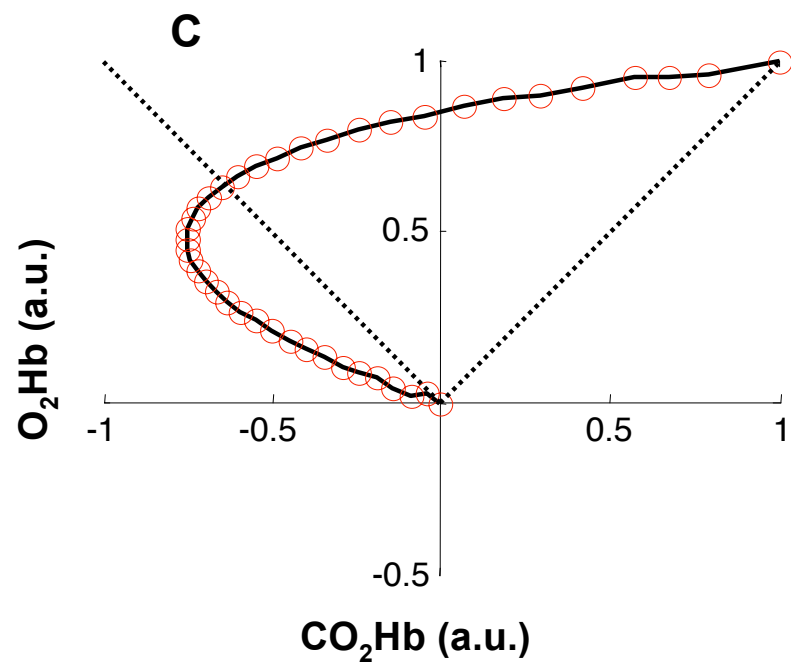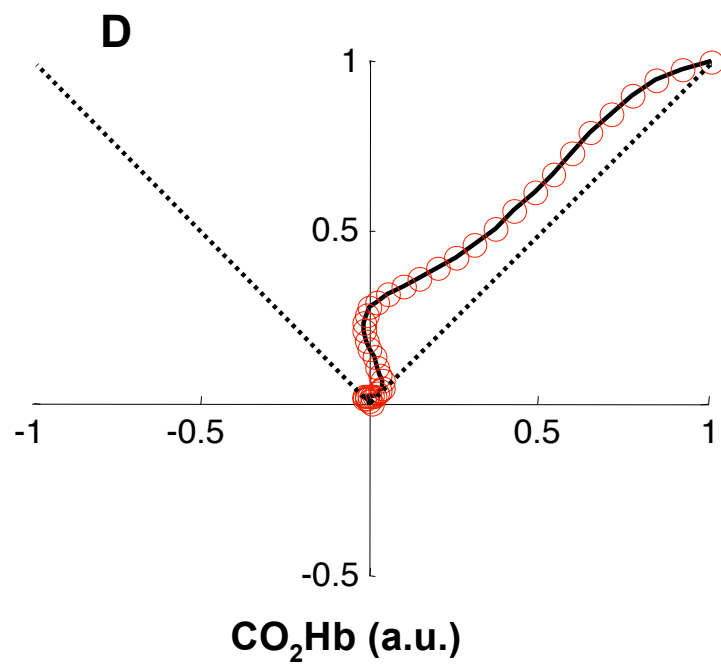

Supplement: MOESM8 [file 9605226]
